# Supplementary material
Source: PubMed Central journal article supplement (PMC7528184)
Supplement: ao0c02634_si_001.pdf [file ao0c02634_si_001.pdf]

## Supporting Information

### Study on Synthesis and Adsorption Properties of $\text{ReO}_4^-$ Ion Imprinted Polymer

Pu Liu<sup>†‡§</sup>, Weiwei Jia<sup>†‡§</sup>, Xiaojian Ou<sup>ϕ</sup>, Chunli Liu<sup>†‡</sup>, Jun Zhang<sup>†‡</sup>, Zhenbin Chen<sup>†‡\*</sup> and Xiaoming Li<sup>‡</sup>.

<sup>†</sup>State Key Laboratory of Advanced Processing and Recycling of Nonferrous Metals, Lanzhou University of Technology, Lanzhou 730050, Gansu, China

<sup>‡</sup>School of Materials Science and Engineering, Lanzhou University of Technology, Lanzhou 730050, Gansu, China.

<sup>ϕ</sup>State Key Laboratory of Nickel and Cobalt Resources Comprehensive Utilization, Jinchang 737100, GanSu, China.

<sup>‡</sup>Baiyin Research Institute of Novel Materials of Lanzhou University of Technology, Baiyin 730900, Gansu, China .

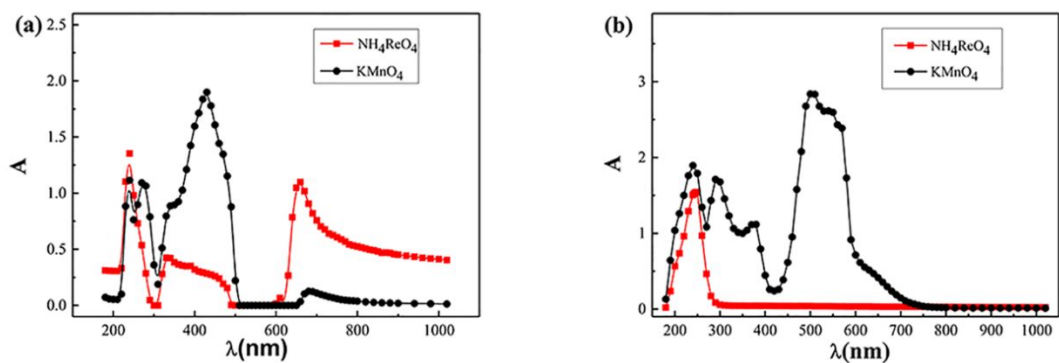

**Figure S1.** Relationship between the absorbency and wavelength of  $\text{ReO}_4^-$  and  $\text{MnO}_4^-$  with ethyl violet photometry method (a), direct measure(b)

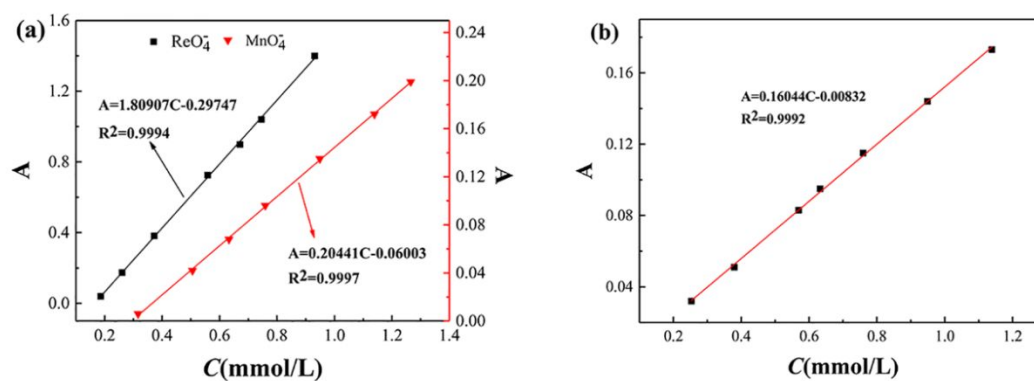

**Figure S2.** The standard curve of  $\text{ReO}_4^-$  and  $\text{MnO}_4^-$  at 658nm with ethyl violet photometry method (a),  $\text{MnO}_4^-$  at 500nm under direct measurement method (b)

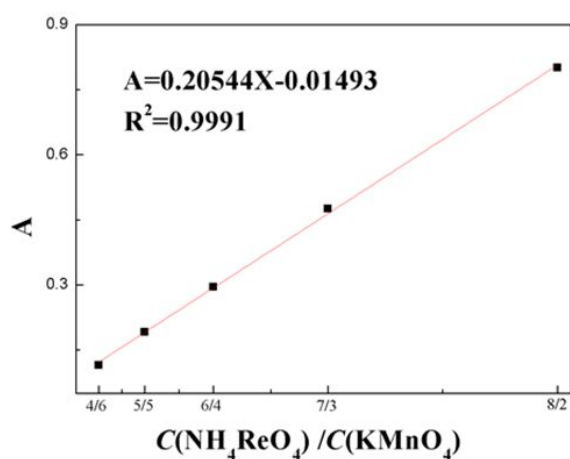

**Figure S3.** The relationship between the absorbency and molar ratio (A) of  $\text{NH}_4\text{ReO}_4/\text{KMnO}_4$
